# Supplementary material
Source: HighWire-hosted journal article supplement (https://cmaj.ca/highwire/filestream/77572/field_highwire_adjunct_files/0/200427-image-1-at.pdf)
Supplement: 200427-image-1-at.pdf [file 200427-image-1-at.pdf]

Appendix 1 (as submitted by authors): Supplementary figure

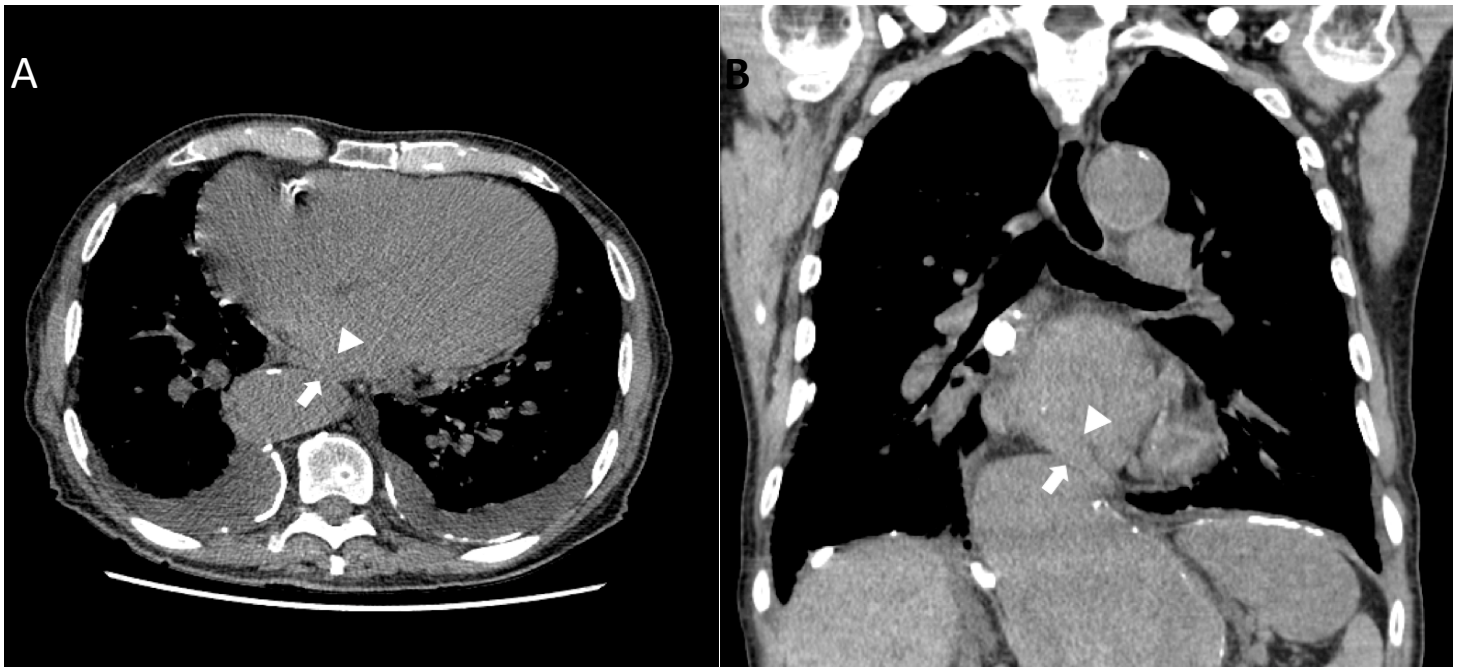

Axial (A) and coronal (B) CT images showing the esophagus being compressed between the aorta (white arrow) and the left atrium (arrowhead).
